# Supplementary material for: Melatonin Inhibits EMT in Bladder Cancer by Targeting Autophagy
Source: MDPI journal article supplement (doi:10.3390/molecules27248649), 2022-12-07
Supplement: s1 [file s1]

Supplementary information

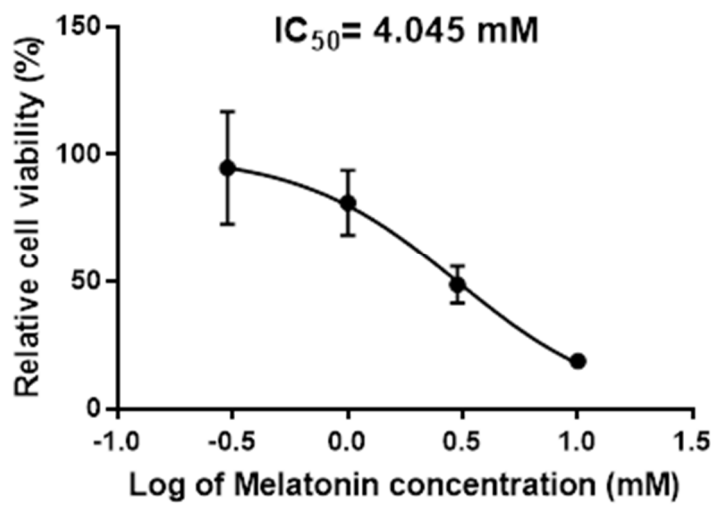

**Figure S1. The cell viability of normal bladder cells after melatonin treatment.** SV-HUC-1 normal bladder cells were incubated with melatonin (0, 0.1, 0.3, 1 or 3 mM) for 24 h, and cell viability was determined by MTT assay. The  $IC_{50}$  was calculated in both cells and provided in the figures.
